# Supplementary material for: COVID-19-related school disruptions and well-being of children and adolescents in Geneva
Source: bioRxiv or medRxiv preprint supplement (doi:10.1101/2022.01.07.21268224), 2022-01-10
Supplement: Supplementary file [file media-1.pdf]

**Supplementary 1.** Stress experienced by children and adolescents according to the number of school absences, stratified by the type of absence and socio-demographic characteristics

|                                                  | Absence from school |                        |                        | p-value <sup>b</sup>   |      |
|--------------------------------------------------|---------------------|------------------------|------------------------|------------------------|------|
|                                                  | None                | Once                   | Twice or more          |                        |      |
|                                                  | N                   | Mean (SD) <sup>a</sup> | Mean (SD) <sup>a</sup> | Mean (SD) <sup>a</sup> |      |
| <b>Total</b>                                     | 538                 | 2.1 (1.2)              | 2.2 (1.2)              | 2.2 (1.2)              | 0.31 |
| <b>School/class closure</b>                      | 538                 | 2.1 (1.2)              | 2.4 (1.3)              | -                      | 0.28 |
| <b>Individual absence</b>                        | 538                 | 2.1 (1.2)              | 2.2 (1.2)              | 2.3 (1.3)              | 0.57 |
| <b>Sex</b>                                       |                     |                        |                        |                        |      |
| Female                                           | 258                 | 2.3 (1.2)              | 2.3 (1.3)              | 2.2 (1.3)              | 0.39 |
| Male                                             | 273                 | 1.9 (1.1)              | 2.2 (1.1)              | 2.2 (1.2)              | 0.39 |
| Diverse                                          | 7                   | 2.0 (1.0)              | 1.5 (0.7)              | 2.5 (2.1)              | 0.82 |
| <b>School level</b>                              |                     |                        |                        |                        |      |
| Primary (4-12 years old)                         | 347                 | 2.0 (1.2)              | 2.1 (1.2)              | 2.2 (1.3)              | 0.39 |
| Lower secondary (12-15 years old)                | 121                 | 2.3 (1.2)              | 2.5 (1.2)              | 2.0 (1.2)              | 0.39 |
| Upper secondary (15-18 years old)                | 64                  | 2.4 (1.2)              | 2.4 (1.4)              | 2.5 (1.0)              | 0.91 |
| <b>Household financial situation<sup>c</sup></b> |                     |                        |                        |                        |      |
| Very good                                        | 182                 | 1.9 (1.0)              | 2.1 (1.2)              | 2.2 (1.3)              | 0.33 |
| Good                                             | 189                 | 2.1 (1.2)              | 2.4 (1.1)              | 1.9 (1.0)              | 0.23 |
| Medium to poor                                   | 107                 | 2.5 (1.5)              | 2.5 (1.4)              | 2.5 (1.4)              | 0.95 |
| No answer                                        | 55                  | 2.1 (1.0)              | 2.0 (1.2)              | 2.3 (1.2)              | 0.62 |

<sup>a</sup> Stress level reported by parents answering the question: Currently, how would you assess your child's stress level on a scale from 1 (lowest) to 6 (highest)?

<sup>b</sup> Kruskal-Wallis test; as p-values were higher than 0.1, we considered that an adjustment for multiple comparisons was not needed.

<sup>c</sup> Very good: affluent, can save money; Good: earning sufficient to cover expenses and to face minor unexpected expenses; Medium to poor: cannot face unexpected expenses and/or need external financial support
